# Supplementary material
Source: MDPI journal article supplement (https://www.mdpi.com/2072-4292/12/24/4095)

**Potential of GPM IMERG precipitation estimates to monitor natural disaster triggers in urban areas: the case of Rio de Janeiro, Brazil**

Augusto Getirana\*<sup>1,2</sup>, Dalia Kirschbaum<sup>1</sup>, Felipe Mandarino<sup>3</sup>, Marta Ottoni<sup>4</sup>, Sana Khan<sup>1,5</sup>, Kristi Arsenault<sup>1,2</sup>

<sup>1</sup>Hydrological Sciences Laboratory, NASA Goddard Space Flight Center, Greenbelt, MD, United States

<sup>2</sup>Science Applications International Corporation, Greenbelt, MD, United States

<sup>3</sup>Instituto Pereira Passos, Rio de Janeiro, Brazil

<sup>4</sup>Geological Survey of Brazil, Rio de Janeiro, Brazil

<sup>5</sup>Earth System Science Interdisciplinary Center, University of Maryland, College Park, MD, United State

\*Corresponding author ([augusto.getirana@nasa.gov](mailto:augusto.getirana@nasa.gov))

**Contents of this file**

Figures S1 to S4

**Introduction**

This document contains Figures S1 to S4, showing the spatial distribution of the probability of detection (POD) and false alarm rate (FAR) for normalized rainfall, rootzone soil moisture (RZSM) and total runoff (TR) over the city of Rio de Janeiro at percentile thresholds of  $\geq 80\%$ ,  $\geq 90\%$ ,  $\geq 95\%$  and  $\geq 98\%$ .

**Figure S1:** POD and FAR maps for rainfall, RZSM and TR events derived from experiments with IMERG Early and IMERG Final at the percentile threshold  $\geq 80\%$  chance of occurrence.

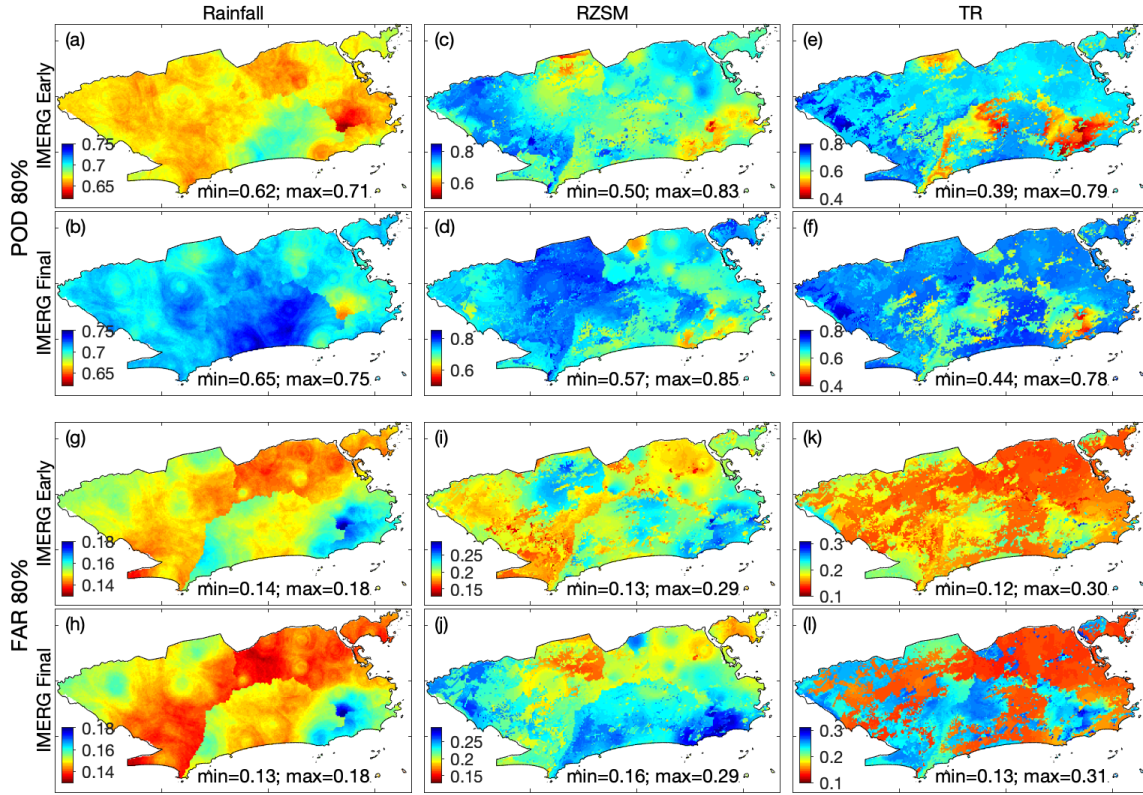

**Figure S2:** POD and FAR maps for rainfall, RZSM and TR events derived from experiments with IMERG Early and IMERG Final at the percentile threshold  $\geq 90\%$  chance of occurrence.

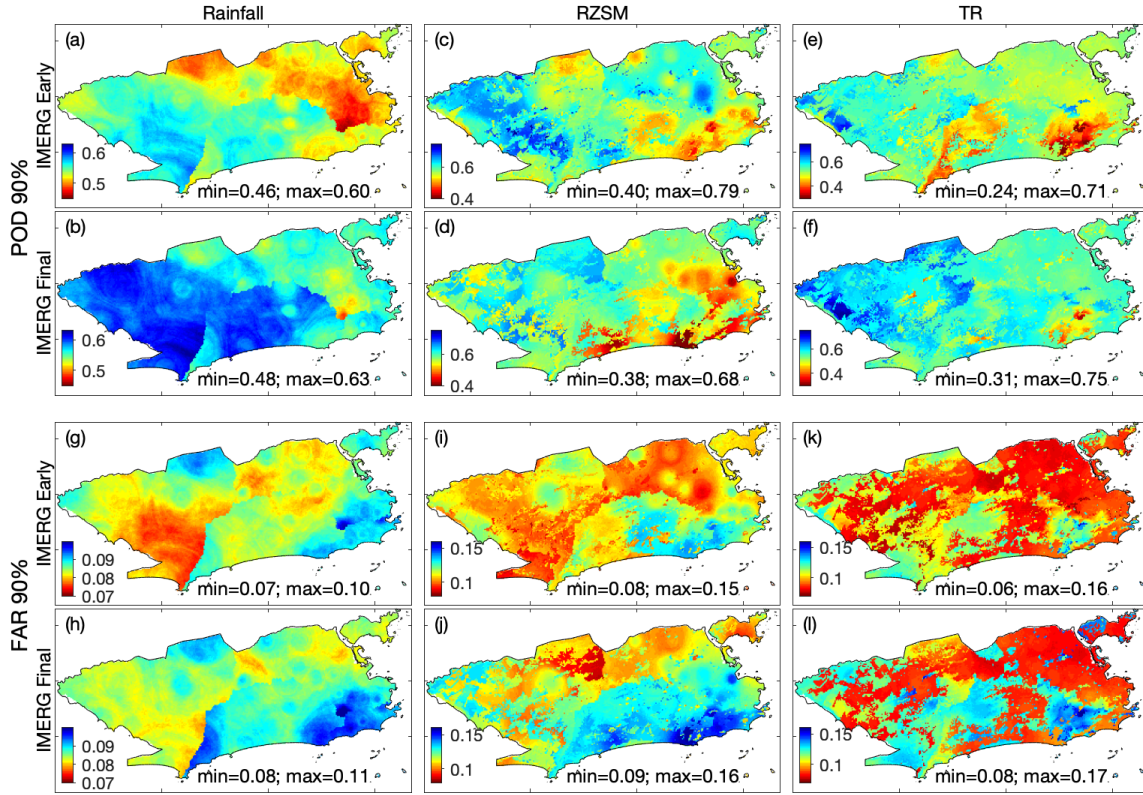

**Figure S3:** POD and FAR maps for rainfall, RZSM and TR events derived from experiments with IMERG Early and IMERG Final at the percentile threshold  $\geq 95\%$  chance of occurrence.

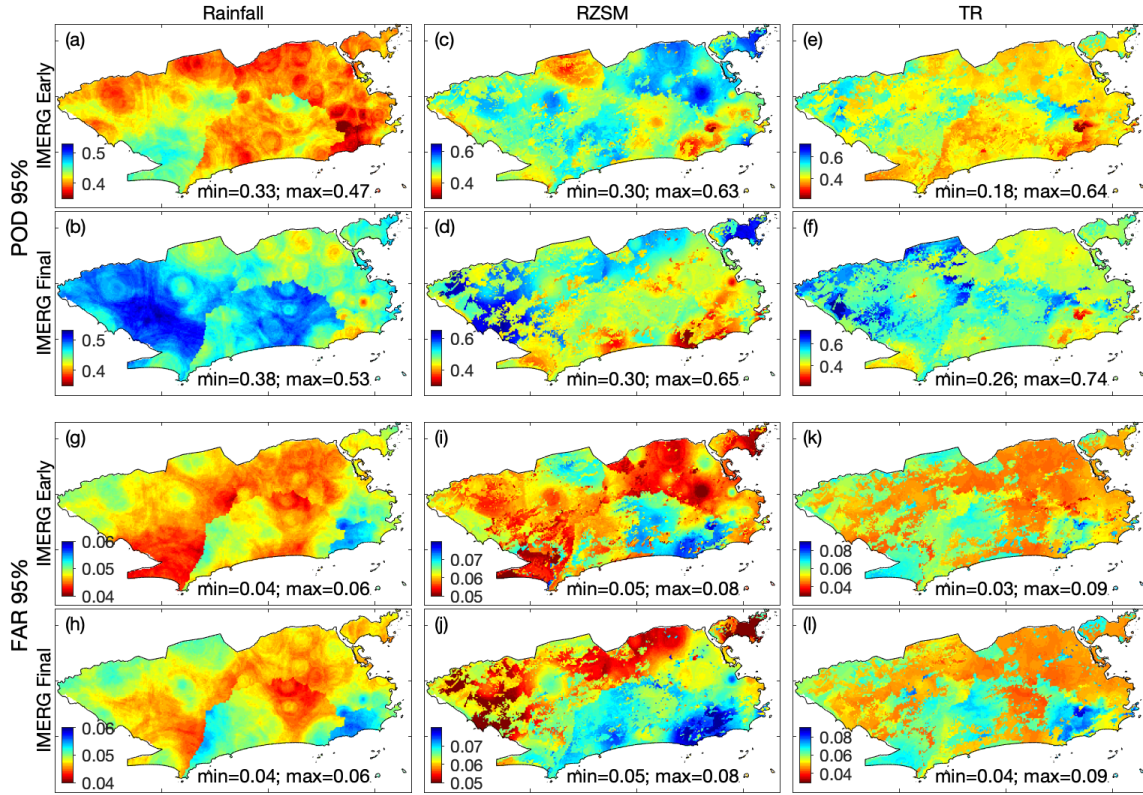

**Figure S4:** POD and FAR maps for rainfall, RZSM and TR events derived from experiments with IMERG Early and IMERG Final at the percentile threshold  $\geq 98\%$  chance of occurrence.

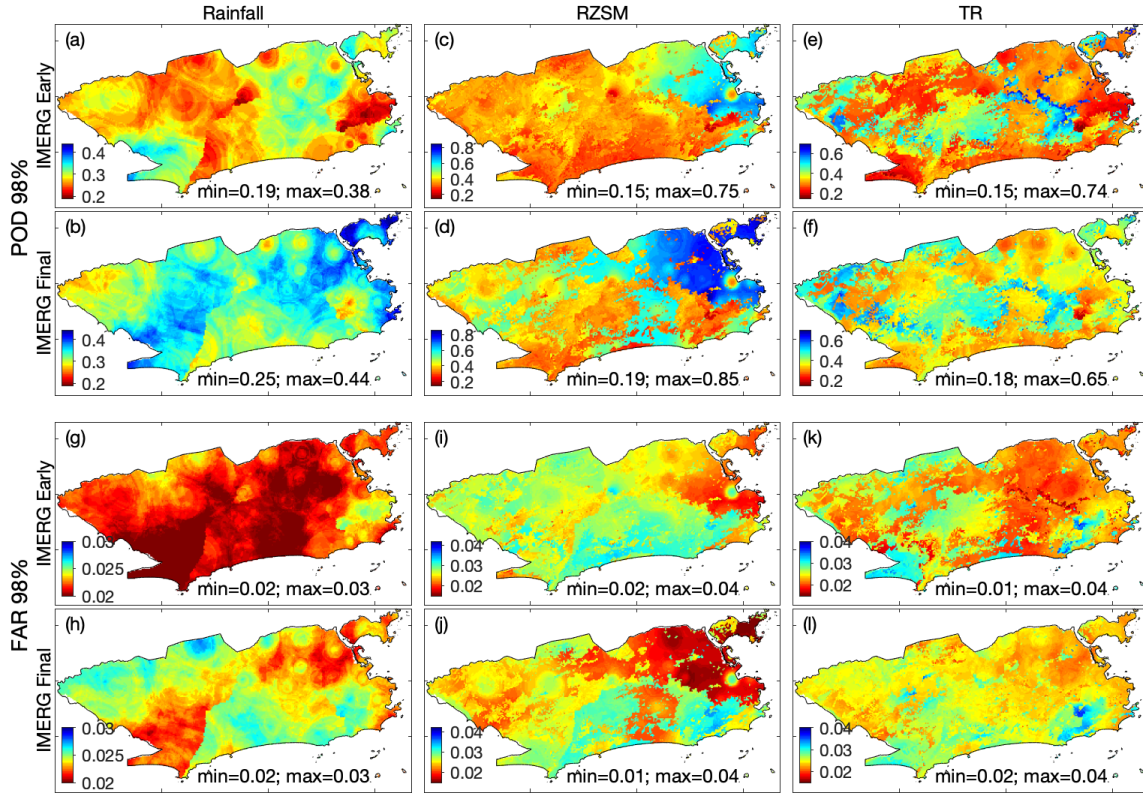

Supplement: s1 [file s1]
